1 **Prevalence, awareness and factors associated with hypertension among adults in**  
2 **rural south-western Uganda: a cross-sectional study**

3  
4 **Authors:** Grace Kansiime MBChB, MMED<sup>1\*</sup>, Edwin Nuwagira MBChB, MMED<sup>1</sup>, Paul Stephen  
5 Obwoya MBChB, MMED<sup>1</sup>, Joseph Baruch Baluku MBChB, MMED, MSc<sup>1,2</sup>, Michael Kanyesigye  
6 BCS, PGD<sup>3</sup>, Christine Twesiime<sup>4</sup>, Peter Ssebutinde MBChB, MPH<sup>4</sup>, Rose Muhindo MBChB,  
7 MMED<sup>1</sup>, Anthony Muyingo MBChB, MMED<sup>1</sup>, Keneth Kananura MBChB, MMED<sup>5</sup>, Pliers Denis  
8 Tusingwire MBChB, MMED <sup>6</sup>, Esther C. Atukunda PhD<sup>7</sup>, Robert Kalyesubula MBChB, MMED,  
9 FISN, PhD, FRCP<sup>8</sup>. Francis Bajunirwe MBChB, MPH, PhD<sup>9\*\*</sup>, Anthony Muiru MD, MPH<sup>10\*\*</sup>

10

11 **Affiliations:**

12 <sup>1</sup> Department of Medicine, Mbarara University of Science and Technology, Mbarara, Uganda.

13 <sup>2</sup> Division of Pulmonology, Kiruddu National Referral Hospital, Kampala, Uganda.

14 <sup>3</sup> Global Health Collaborative, Mbarara University of Science and Technology, Mbarara, Uganda.

15 <sup>4</sup> Ministry of Health, Mbarara District Local Government.

16 <sup>5</sup> Department of Medicine, Mbarara Regional Referral Hospital, Mbarara, Uganda.

17 <sup>6</sup> School of Medicine, Kabale University, Kabale, Uganda

18 <sup>7</sup> Department of Pharmacy, Mbarara University of Science and Technology, Mbarara, Uganda.

19 <sup>8</sup> Department of Physiology and Department of Medicine, Makerere University College of Health  
20 Sciences, Kampala, Uganda.

21 <sup>9</sup> Department of Community Health, Mbarara University of Science and Technology, Mbarara,  
22 Uganda.

23 <sup>10</sup> School of Medicine, University of California, San Francisco

24 **\*\* Equal contribution**

25

26

27 **\*Corresponding author:**

28 Grace Kansime,  
29 Department of Medicine,  
30 Mbarara University of Science and Technology,  
31 PO Box 1410, Mbarara, Uganda  
32 [gkansime@must.ac.ug](mailto:gkansime@must.ac.ug); +256774233498

33

34 **Word count**

35 **Abstract: 329**

36 **Body: 2725**

37 **Tables 2**

38 **Figures 3**

39

40

41 **Key Points**

- 42
- 43 • More than 1 in 4 adults in rural Uganda have hypertension, despite high levels of physical activity (67%)
  - 44 • Hypertension awareness and control rates remain below the global targets
  - 45 • Our data shows that interventions targeting modifiable risk factors are urgently needed to
  - 46 reduce rural hypertension burden.

47

48

49

50

51

52

53

54

55 **Abstract**

56 **Background:** Hypertension is the leading cause of preventable deaths globally, yet there have  
57 been inconsistent reports on its burden and risk factors in rural Sub-Saharan Africa. This study  
58 aimed to assess the prevalence, awareness, and risk factors associated with hypertension  
59 among adults in a rural community in southwestern Uganda.

60 **Methods:** A baseline survey was conducted as part of an ongoing implementation science  
61 cohort study in Ngango, a rural parish in the Mbarara district of southwestern Uganda. The  
62 study included adults aged 18-79 years from eleven villages. Research assistants and  
63 community health workers visited homes to enroll consenting adults. Data collection involved  
64 administering the WHO STEPS questionnaire, which gathered demographic information,  
65 behavioral characteristics, and lifestyle data, including tobacco and alcohol use, salt intake, fruit  
66 and vegetable consumption, and physical activity. Participants were also asked about prior  
67 blood pressure (BP) measurements. BP readings were taken three times, two minutes apart,  
68 along with anthropometric measurements. Hypertension was defined as BP  $\geq 140/90$  mmHg,  
69 based on the average of the last two readings, or self-reported use of antihypertensive  
70 medication. The primary outcome was the prevalence and factors associated with hypertension,  
71 assessed using logistic regression. Secondary outcomes included hypertension awareness and  
72 the proportion of participants with controlled hypertension.

73 **Results:** A total of 953 adults were enrolled. The median age was 43 years, with most  
74 participants being female (61.5%). Hypertension prevalence was 27.3% (260/953). Among  
75 those with hypertension, 61.5% were unaware, 27.7% were on treatment, and 65.3% had  
76 controlled BP. Despite 66.8% of participants reporting physical activity, 63.7% were overweight.  
77 Factors associated with hypertension were age > 40 years (OR 2.26, 95% CI 1.53-3.33; p  
78 <0.001), consuming <3 servings of fruit or vegetables per week (OR 1.62, 95% CI 1.11-2.35, p

79 = 0.012), overweight (OR 1.57, 95% CI 1.05-2.34, p = 0.028), and obesity (OR 2.73, 95% CI  
80 1.80-4.15, p <0.001).

81 **Conclusion:** The prevalence of hypertension in rural southwestern Uganda is high, despite a  
82 relatively young and physically active population, indicating the need for targeted interventions.

83

84

85 **Keywords:** Blood pressure, Cardiovascular disease, Hypertension, Rural Uganda, Sub-Saharan  
86 Africa

87

88

89

90

91

92

93

94

95

96

97

98

99

## 100 **Introduction**

101 Hypertension is the leading cause of preventable deaths worldwide.(1) According to the  
102 World Health Organization (WHO), the prevalence of hypertension is highest in sub-  
103 Saharan Africa, and the average blood pressures in this region are much higher than  
104 global averages.(2) An estimated 10.8 million deaths annually are associated with high  
105 blood pressure and of these, 88% occur in low- and middle-income countries (LMICs).(3)  
106 However, it is estimated that most people with hypertension in rural sub-Saharan Africa  
107 are unaware and untreated while those who are diagnosed are not well controlled.(4, 5)

108 In Uganda, the prevalence of hypertension varies greatly by geographic region (6) with a  
109 disproportionately increasing burden reported in rural areas yet most studies on  
110 hypertension in Uganda have been conducted in urban areas(7, 8) or hospital settings.(9,  
111 10) Population-based studies in rural areas are needed. To fill the knowledge gap on the  
112 epidemiology of hypertension in rural Uganda, we conducted a cross-sectional study,  
113 assessing the prevalence, awareness, and factors associated with hypertension among  
114 adults living in a rural community in south-western Uganda.

115

## 116 **Methods**

### 117 *Study Design and setting*

118 This cross-sectional survey is part of an ongoing mixed methods implementation science cohort  
119 study known as Comprehensive Hypertension Improvement in Rural Uganda (CHIRU study). The  
120 CHIRU study aims to integrate community health workers (CHWs) also called village health teams  
121 (VHTs) in hypertension management in Ngango parish, in Kagongi sub-county, Western Uganda.  
122 A parish is an administrative unit in Uganda consisting of multiple villages. We included adult  
123 residents from eleven villages of Ngango Parish between September 25, 2023 and November 30,

124 2023. Ngango Parish is one of the six parishes in Kagongi sub-county in Mbarara district (Figure  
125 1) which is approximately 270km southwest of Kampala, Uganda's capital city. This Parish was  
126 purposively selected because it houses the only public health facility whose health workers were  
127 part of the original cohort study. The community dwellers are mostly subsistence farmers.

128

129 **Figure 1: Map of Mbarara district showing Kagongi sub-county and Ngango parish.**

130

### 131 *Community Engagement and Study Population*

132 Ngango Parish consists of 11 villages, each supported by two community health workers (CHWs)  
133 who were introduced to the research team by their coordinator at the local health center. These  
134 CHWs are community members trained by the government to link the community with health  
135 facilities. They play a vital role in health education, providing first aid, and managing common  
136 health issues such as diarrhea, malaria, and pneumonia in children, (11, 12), and HIV in adults(13).  
137 Before the study began, the CHWs shared population records with the research team, showing  
138 that Ngango Parish has a total population of 4,355 people, of which 2,133 (49%) are adults aged  
139 18 years and older, including 991 males and 1,142 females.

140 The study targeted adults aged 18-79 years who had lived in Ngango Parish for at least six months  
141 and provided informed consent. Before data collection, the research team, including the principal  
142 investigator (PI) and research assistants, held meetings with local council leaders and CHWs to  
143 inform them about the study and to schedule visits to each village. Data collection was planned for  
144 afternoons from Monday to Saturday to avoid disrupting the community's usual farming and church  
145 activities.

146 To maximize participation, local council leaders and CHWs used local radios (megaphones) and  
147 announcements at communal gatherings, such as places of worship, to inform residents. The  
148 research team conducted house-to-house visits across all 11 villages (including trading  
149 centres/shops), recruiting all eligible adults found at home for the study.

150

151 ***Study procedures***

152 *Training and Data Collection*

153 Community health workers (CHWs) received one week of training on hypertension management  
154 using the CDC's hypertension management curriculum. (14) Research assistants underwent a  
155 3-day training focused on study procedures and the administration of the STEPS tool. For data  
156 collection, each trained research assistant was paired with a CHW to facilitate the process, with  
157 data being collected from participants in their homes.

158 *Study measurements*

159 Data were collected using the WHO STEPS tool for non-communicable diseases (NCDs)  
160 surveillance during household visits.(15) In this stepwise approach to chronic disease risk factor  
161 surveillance, an interviewer-administered questionnaire was used, consisting of three steps:

162 **STEP 1:** We gathered data on demographic, socio-economic, and behavioral characteristics,  
163 including lifestyle factors such as tobacco use, alcohol consumption, salt intake, fruit and  
164 vegetable consumption, and physical activity. Current alcohol users were defined as participants  
165 who had consumed alcohol in the past 30 days. Salt intake was evaluated by asking how often  
166 participants added salt to their food before tasting or during meals and classified as 'Too much'  
167 if they added salt at table always, 'Enough' if they rarely added salt at table and as 'Little' if they  
168 never added salt at table. Physical activity was assessed by inquiring about daily work, typical  
169 modes of transportation, and time spent sitting each day. Additionally, we asked whether  
170 participants had ever had their blood pressure measured.

171 **STEP 2:** Physical measurements were conducted, including weight, height, waist and hip  
172 circumferences, and blood pressure. Blood pressure was measured on the left arm while the  
173 participant was seated with legs uncrossed, back supported, after at least 5 minutes of rest  
174 using an appropriately sized cuff and a battery-powered digital blood pressure machine (Omron  
175 3 Series, Omron, Kyoto, Japan). The cuff (size 22-42cm) was applied to the arm, and the  
176 machine automatically took three BP measurements, two minutes apart; the average of the last  
177 two readings was recorded.

178 Height was measured manually with the participant standing upright against a wall, using a tape  
179 measure to derive the height. Measurements were taken with the participant barefoot, standing  
180 with their back and head against the wall, heels together, and stretched to the fullest. Height  
181 was recorded to the nearest centimeter. Weight was measured using a pre-calibrated digital  
182 scale (SECA 877), with the participant in light clothing and barefoot, and recorded to the nearest  
183 tenth of a kilogram.

184 **STEP 3:** Blood sugar levels were measured using On Call®Plus glucometers (ACON USA), which  
185 were calibrated each morning before data collection. Participants with a random blood sugar  
186 (RBS) reading >11.1mmol/L were scheduled for a follow-up test the next morning after an  
187 overnight fast.

188 We used Research Electronic Data Capture (REDCap, Vanderbilt University), a cloud-based  
189 secure HIPAA-compliant system, for data collection and management.(16)

190

### 191 *Covariates*

192 Descriptive analyses included baseline demographics such as age, sex, education level, marital  
193 status, and occupation. Comorbidities, including diabetes mellitus (DM), were considered, along  
194 with body mass index (BMI), dietary salt intake, fruit and vegetable consumption. Lifestyle factors  
195 and social habits like physical activity, smoking, and alcohol consumption were also included.



196

### 197 *Study Outcomes*

198 The primary outcome of the study was the prevalence of hypertension among adults in the rural  
199 community. Hypertension was defined as a blood pressure  $\geq 140/90$  mmHg per the 2020  
200 International Society of Hypertension (ISH) Global Hypertension Practice Guidelines(17) or taking  
201 anti-hypertension medication. Using the same guidelines, blood pressure readings were grouped  
202 as normal blood pressure for SBP < 130 mmHg and DBP < 85 mmHg, high normal blood pressure  
203 (Prehypertension) for SBP 130–139 and/or DBP 85–89, grade 1 hypertension SBP 140– 159  
204 mmHg and/or DBP 90–99 mmHg, grade 2 hypertension SBP  $\geq 160$  mmHg and/or DBP  $\geq 100$   
205 mmHg. All definitions were based on an average of the last two of the three blood pressure  
206 readings taken for each participant. Secondary outcomes included the awareness of hypertension  
207 status, the proportion of participants with controlled hypertension, and the identification of factors  
208 associated with hypertension. Hypertension awareness was defined as the proportion of  
209 participants who were aware that they had raised blood pressure among those found to have  
210 hypertension in the study while controlled hypertension was defined as BP < 140/90 mmHg among  
211 those who were taking anti-hypertension medications. Diabetes mellitus (DM) was defined as a  
212 fasting blood sugar  $\geq 7.0$  mmol/l and/or reported use of antidiabetic medications. High BMI was  
213 defined as a BMI  $\geq 25$  kilograms/meters<sup>2</sup>

214

215

### 216 *Data analysis*

217 Descriptive statistics were used to summarize the data: means and standard deviations for  
218 normally distributed continuous variables, and medians with interquartile ranges for skewed  
219 continuous variables. Categorical variables were reported as counts and percentages. Baseline  
220 characteristics were compared between participants with and without hypertension using the  
221 Wilcoxon rank-sum test for continuous variables and the chi-square ( $\chi^2$ ) test for categorical

222 variables. Hypertension prevalence was calculated as the percentage of participants with a blood  
223 pressure  $\geq 140/90$  mmHg or those taking prescribed antihypertensive medications.

224 For identifying factors associated with hypertension, we selected variables based on domain  
225 knowledge, including age, sex, body mass index, physical activity, education level, occupation,  
226 comorbidities like diabetes mellitus, salt and fruit intake, smoking, and alcohol use. Binary logistic  
227 regression was performed at both univariate and multivariable levels. Variables with a p-value  
228  $< 0.23$  in univariate analysis and those considered biologically plausible including diabetes mellitus,  
229 physical inactivity, diet (fruit/vegetable and salt consumption) were included in the multivariable  
230 analysis. Results are presented as crude and adjusted odds ratios with 95% confidence intervals  
231 and p-values. Factors with  $p < 0.05$  were considered statistically significant.

232 We used the Strengthening The Reporting of Observational Studies in Epidemiology (STROBE)  
233 cross-sectional study checklist when writing our report(18).

234

### 235 *Ethical considerations*

236 The protocol received ethical approval from the Mbarara University of Science and Technology  
237 research and ethics committee (MUST-2023-382) and the Uganda National Council for Science  
238 and Technology (HS2357ES). All study participants gave written informed consent to participate  
239 in the study and the study was conducted per the Declaration of Helsinki 2013.

## 240 **Results**

241 Between September and November 2023, we screened 972 adults in Ngango Parish for eligibility  
242 and included 953 participants for this study as shown below (Figure 2).

243

### 244 **Figure 2: Study flow diagram**

245

### 246 *Sociodemographic Characteristics of Participants*

247 Of the 953 participants, 586 (61.5%) were female, and the median (IQR) age was 42.6 (30.1-56.7)  
 248 years. Six out of every 10 individuals were overweight (BMI >24.9 kg/m<sup>2</sup>) although 66.8% reported  
 249 being physically active. Less than half of the participants 415/953 (43.5%) recalled having ever  
 250 had their BP measured. The median (IQR) random blood sugar of the participants was 5.7 (4.9-6.7)  
 251 with only 30 (3.1%) participants having diabetes mellitus. Other baseline characteristics are shown  
 252 on Table 1. Participants were evenly distributed among all participating villages (Figure s1)

253 **Table 1: Baseline characteristics of study participants**

254

|                                          |                  |                  |                  |         |
|------------------------------------------|------------------|------------------|------------------|---------|
| Physical activity n (%)                  |                  |                  |                  |         |
| No                                       | 316 (33.2)       | 231 (33.3)       | 85 (32.7)        |         |
| Yes                                      | 637 (66.8)       | 462 (66.7)       | 175 (67.3)       |         |
|                                          |                  |                  |                  | 0.85    |
| Current Alcohol Use n (%)                |                  |                  |                  |         |
| No                                       | 171 (17.9)       | 121 (17.5)       | 50 (19.2)        |         |
| Yes                                      | 782 (82.1%)      | 572 (82.5%)      | 210 (80.8%)      |         |
|                                          |                  |                  |                  | 0.53    |
| Current smoker n (%)                     |                  |                  |                  |         |
| No                                       | 863 (90.6%)      | 633 (91.3%)      | 230 (88.5%)      | 0.18    |
| Yes                                      | 90 (9.4%)        | 60 (8.7%)        | 30 (11.5%)       |         |
|                                          | Total<br>N=953   | No HTN<br>N=693  | HTN<br>N=260     | p-value |
| <b>Sex n (%)</b>                         |                  |                  |                  |         |
| Male                                     | 367 (38.5)       | 270 (39.0)       | 97 (37.3)        | 0.64    |
| Female                                   | 586 (61.5)       | 423 (61.0)       | 163 (62.7)       |         |
| <b>Age median (IQR)</b>                  | 43 (30-57)       | 39 (28-54)       | 52 (35-65)       | <0.001  |
| <b>Marital status N= 921 n (%)</b>       |                  |                  |                  |         |
| Single                                   | 136 (14.8%)      | 109 (16.3)       | 27 (10.6)        | 0.026   |
| Married                                  | 655 (71.1%)      | 474 (71.1)       | 181 (71.3)       |         |
| Separated/Widowed                        | 130 (14.1%)      | 84 (12.6)        | 46 (18.1)        |         |
| <b>Own a mobile phone n (%)</b>          |                  |                  |                  |         |
| No                                       | 444 (46.6)       | 325 (46.9)       | 119 (45.8)       | 0.76    |
| Yes                                      | 509 (53.4)       | 368 (53.1)       | 141 (54.2)       |         |
| <b>Monthly income, median (IQR), USD</b> | 39.5 (15.8-79.0) | 39.5 (18.4-65.8) | 39.5 (15.8-79.0) | 0.26    |
| <b>Education level N=946 n (%)</b>       |                  |                  |                  |         |
| No Formal Education                      | 158 (16.7)       | 98 (14.2)        | 60 (23.3)        | <0.001  |
| Primary                                  | 555 (58.7)       | 404 (58.6)       | 151 (58.8)       |         |
| Secondary and Above                      | 233 (24.6)       | 187 (27.1)       | 46 (17.9)        |         |
| <b>BMI median (IQR) kg/m<sup>2</sup></b> | 26.7 (23.7-30.3) | 26.3 (23.4-29.7) | 27.8 (24.5-31.6) | <0.001  |
| <b>BMI category* n (%)</b>               |                  |                  |                  |         |
| Underweight                              | 28 (2.9)         | 21 (3.0)         | 7 (2.7)          | <0.001  |
| Normal                                   | 318 (33.4)       | 249 (35.9)       | 69 (26.5)        |         |
| Overweight                               | 348 (36.5)       | 260 (37.5)       | 88 (33.8)        |         |
| Obesity                                  | 259 (27.2)       | 163 (23.5)       | 96 (36.9)        |         |

|                                                   |               |               |               |        |
|---------------------------------------------------|---------------|---------------|---------------|--------|
| <b>RBS median (IQR) mmol/l</b>                    | 5.7 (4.9-6.7) | 5.7 (4.9-6.7) | 5.7 (4.8-6.8) | 0.67   |
| <b>Diabetes Mellitus n (%)</b>                    |               |               |               |        |
| <b>Yes</b>                                        | 30 (3.1)      | 16 (2.3)      | 14 (5.4%)     | 0.015  |
| <b>No</b>                                         | 923 (96.9)    | 677 (97.7)    | 246 (94.6%)   |        |
| <b>Ever had a BP measured n (%)</b>               |               |               |               |        |
| <b>Yes</b>                                        | 415 (43.5)    | 265 (38.2)    | 150 (57.7)    | <0.001 |
| <b>No</b>                                         | 538 (56.5)    | 428 (61.8)    | 110 (42.3)    |        |
| <b>Reported salt intake, N=898, n (%)</b>         |               |               |               |        |
| <b>Too much</b>                                   | 90 (10.0)     | 65 (9.9)      | 25 (10.3)     | 0.10   |
| <b>Enough</b>                                     | 498 (55.5)    | 379 (57.8)    | 119 (49.2)    |        |
| <b>Little</b>                                     | 310 (34.5)    | 212 (32.3)    | 98 (40.5)     |        |
| <b>Daily Fruit and Veg Servings, N=933, n (%)</b> |               |               |               |        |
| <b>1</b>                                          | 142 (15.2)    | 98 (14.4)     | 44 (17.3)     | 0.24   |
| <b>2</b>                                          | 527 (56.5)    | 378 (55.7)    | 149 (58.7)    |        |
| <b>3</b>                                          | 125 (13.4)    | 99 (14.6)     | 26 (10.2)     |        |
| <b>≥4</b>                                         | 139 (14.9)    | 104 (15.3)    | 35 (13.8)     |        |
| <b>Physical activity n (%)</b>                    |               |               |               |        |
| <b>No</b>                                         | 316 (33.2)    | 231 (33.3)    | 85 (32.7)     | 0.85   |
| <b>Yes</b>                                        | 637 (66.8)    | 462 (66.7)    | 175 (67.3)    |        |
| <b>Current Alcohol Use n (%)</b>                  |               |               |               |        |
| <b>Yes</b>                                        | 171 (17.9)    | 121 (17.5)    | 50 (19.2)     | 0.53   |
| <b>No</b>                                         | 782 (82.1%)   | 572 (82.5%)   | 210 (80.8%)   |        |
| <b>Current smoker n (%)</b>                       |               |               |               |        |
| <b>No</b>                                         | 863 (90.6%)   | 633 (91.3%)   | 230 (88.5%)   | 0.18   |
| <b>Yes</b>                                        | 90 ( 9.4%)    | 60 ( 8.7%)    | 30 (11.5%)    |        |

255 BMI; body mass index, IQR; interquartile range \*BMI categories: Underweight <18.5kg/m<sup>2</sup>, Normal 18.5-24.9kg/m<sup>2</sup>,

256 overweight 25-29.9kg/m<sup>2</sup> and Obesity ≥30kg/m<sup>2</sup>

257

258 **Prevalence and distribution of Hypertension and pre-hypertension among study**  
 259 **participants**

260 The overall prevalence of hypertension in this rural community population was 27.3% (260/953)  
 261 while 13.6% (130 /953) had pre-hypertension. Hypertension prevalence was similar among males  
 262 and females (26.4% vs 27.8% p-value 0.64. Most of the participants had stage 1 hypertension  
 263 (47%), followed by pre-hypertension (38%) and grade 2 hypertension (15%) (Figure s2).

264 **Awareness and control of Hypertension**

265 Of the 260 participants with hypertension, 160 (61.5%) were unaware that they had hypertension,  
 266 72 (27.7%) were on treatment and 47/72 (65.3%) had their blood pressure controlled. Females

267 were more likely to be aware and on treatment for hypertension although males had better BP  
 268 control among those on treatment. (Figure 3)

269  
 270 **Figure 3:** A bar graph showing the proportion of participants aware of their hypertension status,  
 271 those not on medication, and those with controlled hypertension by Sex.

272

273 **Factors associated with hypertension among adults in Ngango Parish**

274 Participants who were aged 40 years and above had higher odds of having hypertension  
 275 compared to those below 40 (OR 2.26, 95% CI 1.53-3.33, p <0.001), consuming less than 3 fruit  
 276 or vegetable servings per week (OR 1.62 95% CI 1.11-2.35, p 0.012), and higher BMI was also  
 277 associated with hypertension; overweight (OR 1.57; 95% CI 1.05-2.34, p 0.028) and obesity (OR  
 278 2.73; 95% CI 1.80-4.15, p <0.001) compared to normal weight. There was no significant  
 279 association between hypertension and diabetes mellitus, alcohol intake, smoking, salt /fruit /  
 280 vegetable consumption or physical activity (Table 2, and figure s3)

281

282 **Table 2: Factors associated with hypertension among adults in Ngango parish**

| Characteristic        | Univariable<br>COR (95% CI) | P Value | Multivariable<br>AOR (95%) | P Value |
|-----------------------|-----------------------------|---------|----------------------------|---------|
| Age ≥ 40              | 2.391 (1.766-3.235)         | <0.001  | 2.259 (1.534-3.326)        | <0.001  |
| Male sex              | 0.932 (0.695-1.251)         | 0.64    | 1.012 (0.702 1.459)        | 0.948   |
| <b>Education</b>      |                             |         |                            |         |
| No formal education   | 2.489 (1.579-3.924)         | <0.001  | 1.655 (0.891- 3.075)       | 0.111   |
| Primary education     | 1.519 (1.047-2.206)         | 0.028   | 1.126 (0.675-1.878)        | 0.650   |
| <b>Marital Status</b> |                             |         |                            |         |
| Married               | 1.542 (0.978-2.429)         | 0.062   | 0.686 (0.354-1.328)        | 0.264   |
| Separated/Widowed     | 2.211 (1.270-3.847)         | 0.005   | 0.686 (0.314-1.496)        | 0.343   |

**Occupation**

|          |                      |       |                      |       |
|----------|----------------------|-------|----------------------|-------|
| Business | 1.550 (0.728-3.302)  | 0.256 | 1.416 (0.606-3.312)  | 0.422 |
| Farmer   | 1.515 (0.804-2.856)  | 0.198 | 1.174 (0.526-2.622)  | 0.695 |
| Student  | 0.580 (0.240-1.397)  | 0.224 | 0.660 (0.232-1.874)  | 0.435 |
| Retired  | 3.077 (0.722-13.110) | 0.129 | 3.507 (0.701-17.556) | 0.127 |

**Owns a phone**

|     |                     |       |  |  |
|-----|---------------------|-------|--|--|
| Yes | 1.046 (0.786-1.393) | 0.756 |  |  |
|-----|---------------------|-------|--|--|

|                          |                     |       |                      |       |
|--------------------------|---------------------|-------|----------------------|-------|
| <b>Diabetes mellitus</b> | 2.408 (1.158-5.007) | 0.019 | 1.726 (0.777- 3.837) | 0.180 |
|--------------------------|---------------------|-------|----------------------|-------|

**BMI category**

|             |                     |       |                     |       |
|-------------|---------------------|-------|---------------------|-------|
| Underweight | 1.203 (0.491-2.947) | 0.686 | 0.914 (0.329-2.543) | 0.864 |
|-------------|---------------------|-------|---------------------|-------|

|            |                    |       |                      |              |
|------------|--------------------|-------|----------------------|--------------|
| Overweight | 1.22 (0.852-1.751) | 0.276 | 1.5706 (1.051-2.344) | <b>0.028</b> |
|------------|--------------------|-------|----------------------|--------------|

|         |                     |                  |                     |                  |
|---------|---------------------|------------------|---------------------|------------------|
| Obesity | 2.125 (1.472-3.068) | <b>&lt;0.001</b> | 2.735 (1.801-4.154) | <b>&lt;0.001</b> |
|---------|---------------------|------------------|---------------------|------------------|

**Physical Activity**

|     |                     |       |                     |       |
|-----|---------------------|-------|---------------------|-------|
| Yes | 1.029 (0.760-1.394) | 0.851 | 0.898 (0.629-1.282) | 0.554 |
|-----|---------------------|-------|---------------------|-------|

|                                                   |                     |       |                    |              |
|---------------------------------------------------|---------------------|-------|--------------------|--------------|
| Less than 3 fruit and Vegetable servings per week | 1.349 (0.969-1.880) | 0.079 | 1.618(1.113-2.353) | <b>0.012</b> |
|---------------------------------------------------|---------------------|-------|--------------------|--------------|

**Salt Intake**

|          |                     |       |                     |       |
|----------|---------------------|-------|---------------------|-------|
| Too much | 1.208 (0.767-1.903) | 0.414 | 1.140 (0.779-2.304) | 0.291 |
|----------|---------------------|-------|---------------------|-------|

|        |                     |       |                     |       |
|--------|---------------------|-------|---------------------|-------|
| Little | 1.187 (0.890-1.584) | 0.243 | 1.547 (1.092-2.190) | 0.014 |
|--------|---------------------|-------|---------------------|-------|

|                     |                     |       |                    |       |
|---------------------|---------------------|-------|--------------------|-------|
| Current alcohol use | 1.126 (0.781-1.622) | 0.526 | 0.967(0.600-1.463) | 0.775 |
|---------------------|---------------------|-------|--------------------|-------|

|                |                     |       |                     |       |
|----------------|---------------------|-------|---------------------|-------|
| Current smoker | 1.376 (0.866-2.187) | 0.177 | 1.285 (0.736-2.243) | 0.378 |
|----------------|---------------------|-------|---------------------|-------|

283

284 *AOR; adjusted odds ratio, CI; confidence interval, COR; crude odds ratio.*

285

286 **Discussion**

287 This cross-sectional study of individuals living in rural Uganda reveals a relatively high prevalence

288 of hypertension, a low rate of hypertension awareness, and fair hypertension control rates among

289 those on treatment. Identified risk factors for hypertension included older age and higher BMI.

290 While the epidemiology of hypertension has been well studied in urban populations in Uganda,

291 there is limited data from rural areas, and thus our work fills an important knowledge gap in the

292 field.

293

294 Although the prevalence of hypertension in our rural population was lower compared to the  
295 Ugandan national average (31.5%),<sup>(6)</sup> it is one of the highest reported in western Uganda, adding  
296 to the literature on the geographic variation in hypertension prevalence. One potential reason for  
297 these differences in prevalence is variations in BP measurement protocols across studies, which  
298 would make comparisons within studies difficult. Another more concerning reason for the higher  
299 prevalence in our study could be an increase in prevalence over time; for instance, one study from  
300 rural western Uganda found a prevalence of 14.6% in 2013 <sup>(19)</sup> compared with our findings of  
301 27% a decade later. This increasing trend of hypertension among rural dwellers has been shown  
302 in other studies from sub-Saharan Africa.<sup>(20-22)</sup> This highlights the need to conduct longitudinal  
303 studies that include diverse communities to better understand the burden of hypertension in  
304 Uganda.

305  
306 Consistent with our current understanding of hypertension pathophysiology,<sup>(23, 24)</sup> we found that  
307 older age, low fruit/vegetable consumption and higher BMI were significantly associated with  
308 hypertension in our study. We were however surprised by the high prevalence of overweight and  
309 obesity. Some have suggested that individuals living in rural Africa are physically active in their  
310 daily farming work and have not adopted the Westernized lifestyle to a greater extent.<sup>(19, 21, 25-  
311 27)</sup> We postulate that despite of the self-reported high physical activity, the high rates of overweight  
312 and obesity are driven by dietary patterns and not a sedentary lifestyle among rural dwellers. Diets  
313 in rural Uganda are characterized by monotonous high-glycemic-index staple foods and sugary  
314 foods that are associated with high BMIs.<sup>(28)</sup> In fact, 72% of participants reported having  $\leq 2$   
315 servings of fruits and vegetables per day, far below the recommended 5 servings that have been  
316 shown to reduce all-cause mortality and CVD-related deaths.<sup>(29)</sup> Given the increasing rates of  
317 overweight and obesity among rural dwellers, more innovative ways are needed to address this  
318 key hypertension risk factor.

319

320 The observed low rates of hypertension awareness are concerning but unfortunately consistent  
321 with other studies from Africa, (30) (31) and highlights the need for ongoing strategies to address  
322 this burden hypertension. Despite the low The fact that only two out of every five individuals have  
323 ever had their blood pressure measured further underscores the extent of work needed to improve  
324 screening, treatment, and control in our settings. Despite the low rates of awareness, those who  
325 were on treatment exhibited fairly good hypertension control, as has been demonstrated in  
326 previous studies.(22) This finding highlights a crucial opportunity for improving outcomes if more  
327 individuals are made aware of their condition and receive appropriate treatment for hypertension.  
328 We leveraged an existing frame work of community health workers to rapidly screen for  
329 hypertension (visiting almost 700 households in a few months), demonstrating that this approach  
330 can be an efficient strategy to increase hypertension awareness in rural areas.

331  
332 Our findings should be interpreted in the context of our study limitations. First, this is a cross-  
333 sectional study, with blood pressure measured in one encounter, which can lead to an  
334 overestimation of hypertension prevalence because we were unable to confirm the presence of  
335 elevated BP on two separate occasions. In addition, while we assessed the association between  
336 behavioral risk factors and hypertension, there is likely an element of recall bias regarding,  
337 vegetable and fruit consumption, salt intake, and physical activity. Finally, while we moved from  
338 home to home during data collection, we did convenient sampling as we only enrolled those people  
339 we found at home. However, we utilized a validated WHO data collection instrument to obtain our  
340 data and thus confident in our measurements. Moreover, the BP measurements were performed  
341 at home (cf. office measurements), minimizing the possibility of white coat hypertension as  
342 participants were likely to be more relaxed in their familiar home environments.

343  
344 Despite these limitations, our study was innovative by using a home-to-home approach in the  
345 afternoons when most people are back home from their fields and included all adults found at



346 home to get a good representation of this community. The finding that less than half of the adults  
347 in the community have had their BP measured highlights the need for accessible BP monitoring,  
348 such as community-placed machines overseen by VHTs. This would supplement the current  
349 practice of BP measurement, which is limited to health facility visits or infrequent health camps.

350 **Conclusion:** We report a high prevalence of hypertension, a low rate of disease awareness, with  
351 a fair control among relatively young physically active individuals living in rural Uganda.

352

353 **Disclosure:**

354 The authors report no conflicts of interest in this work.

355

356 **Funding:**

357 Funding for this work came from the Massachusetts General Hospital Center for Global Health's  
358 project entitled "First Mile: Powering the Academic Medical Center to Delivery Healthcare in the  
359 Community in Uganda," supported through the Wyss Medical Foundation.

360 **Acknowledgment**

361

362 We are profoundly grateful to Prof. Ivers Louise for her guidance and mentorship throughout the  
363 manuscript preparation. We are also immensely thankful to the research assistants and Village  
364 Health Team members for their diligent efforts and dedication. Finally, we extend our sincere  
365 appreciation to all study participants from the villages of Ngango Parish, Kagongi Sub-county,  
366 whose participation and cooperation were crucial to the success of this research.

367

368 **Author contributions:**

369 GK: Conceptualization, Data curation, Study administration, Formal analysis, Writing - original  
370 draft, Writing - review and editing; EN: Conceptualization, Writing - review and editing; PSO: Data  
371 curation, Writing - review and editing; BBJ: Conceptualization, Writing - original draft, Writing -  
372 review and editing; MK: Formal analysis, Writing - original draft, Writing - review and editing; CT:  
373 Study administration, Data curation, Writing - review and editing; PS: Data curation, Writing-

374 review and editing; RM: Formal analysis, Writing - review and editing; AM<sup>1</sup>: Data curation,  
375 Methodology, Writing - review and editing; KK: Writing - original draft, Writing - review and editing;  
376 TPD: Conceptualization, Study administration, data curation, Writing - review and editing. ECA:  
377 Data curation and analysis, Writing - review and editing; RK: Conceptualization, Methodology,  
378 Writing - review and editing; FB: Conceptualization, Study administration, Writing - review and  
379 editing. AM<sup>2</sup>: Conceptualization, Methodology, Writing - review and editing.

380

381

## 382 **References**

383

- 384 1. Zhou B, Carrillo-Larco RM, Danaei G, Riley LM, Paciorek CJ, Stevens GA, et al. Worldwide trends in  
385 hypertension prevalence and progress in treatment and control from 1990 to 2019: a pooled analysis of  
386 1201 population-representative studies with 104 million participants. *The Lancet*. 2021;398(10304):957-  
387 80.
- 388 2. WorldHealthOrganization. A global Report on Hypertension: The race against a silent killer. Sept  
389 2023. World Health Organization; 2023.
- 390 3. Zhou B, Perel P, Mensah GA, Ezzati M. Global epidemiology, health burden and effective  
391 interventions for elevated blood pressure and hypertension. *Nature Reviews Cardiology*.  
392 2021;18(11):785-802.
- 393 4. Ogah OS, Rayner BL. Recent advances in hypertension in sub-Saharan Africa. *Heart*.  
394 2013;99(19):1390-7.
- 395 5. Ferdinand KC. Uncontrolled hypertension in sub-Saharan Africa: Now is the time to address a  
396 looming crisis. *The Journal of Clinical Hypertension*. 2020;22(11):2111.
- 397 6. Lunyera J, Kirenga B, Stanifer JW, Kasozi S, van der Molen T, Katagira W, et al. Geographic  
398 differences in the prevalence of hypertension in Uganda: Results of a national epidemiological study. *PloS*  
399 *one*. 2018;13(8):e0201001.
- 400 7. Batte A, Gyagenda JO, Otwombe K, Muhindo R, Bagasha P, Kiggundu D, et al. Prevalence and  
401 predictors of hypertension among adults in Mbarara City, Western Uganda. *Chronic Illness*.  
402 2023;19(1):132-45.
- 403 8. Twinamasiko B, Lukenge E, Nabawanga S, Nansalire W, Kobusingye L, Ruzaaza G, et al. Sedentary  
404 lifestyle and hypertension in a periurban area of Mbarara, South western Uganda: a population based  
405 cross sectional survey. *International journal of hypertension*. 2018;2018.
- 406 9. Saasita PK, Senoga S, Muhongya K, Agaba DC, Migisha R. High prevalence of uncontrolled  
407 hypertension among patients with type 2 diabetes mellitus: a hospital-based cross-sectional study in  
408 southwestern Uganda. *Pan African Medical Journal*. 2021;39(1).
- 409 10. Herbst AG, Olds P, Nuwagaba G, Okello S, Haberer J. Patient experiences and perspectives on  
410 hypertension at a major referral hospital in rural southwestern Uganda: a qualitative analysis. *BMJ open*.  
411 2021;11(1):e040650.

- 412 11. Rukundo GB, Kwesiga B, Ario AR. Improving Malaria Reporting by Village Health Teams under  
413 Integrated Community Case Management: A Policy Brief. 2016.
- 414 12. Musoke D, Gonza J, Ndejjo R, Ottosson A, Ekirapa-Kiracho E. Uganda's village health team  
415 program. *Health for the People: National Community Health Worker Programs from Afghanistan to*  
416 *Zimbabwe*. 2020;405.
- 417 13. Perry S, Fair CD, Burrowes S, Holcombe SJ, Kalyesubula R. Outsiders, insiders, and intermediaries:  
418 village health teams' negotiation of roles to provide high quality sexual, reproductive and HIV care in  
419 Nakaseke, Uganda. *BMC Health Services Research*. 2019;19:1-12.
- 420 14. CDC. Hypertension Management Training Curriculum. 2021. p.  
421 [https://www.cdc.gov/globalhealth/healthprotection/ncd/training/hypertension-management-](https://www.cdc.gov/globalhealth/healthprotection/ncd/training/hypertension-management-training.html)  
422 [training.html](https://www.cdc.gov/globalhealth/healthprotection/ncd/training/hypertension-management-training.html).
- 423 15. WorldHealthOrganisation. The WHO STEPwise approach to noncommunicable disease risk factor  
424 surveillance (STEPS) Question-by-Question Guide. Geneva, Switzerland2020.
- 425 16. Harris PA, Taylor R, Thielke R, Payne J, Gonzalez N, Conde JG. Research electronic data capture  
426 (REDCap)--a metadata-driven methodology and workflow process for providing translational research  
427 informatics support. *J Biomed Inform*. 2009 Apr;42(2):377-81. PubMed PMID: 18929686. PMCID:  
428 PMC2700030. Epub 2008/10/22. eng.
- 429 17. Unger T, Borghi C, Charchar F, Khan NA, Poulter NR, Prabhakaran D, et al. 2020 International  
430 Society of Hypertension Global Hypertension Practice Guidelines. *Hypertension*. 2020 Jun;75(6):1334-57.  
431 PubMed PMID: 32370572. Epub 2020/05/07. eng.
- 432 18. von Elm E, Altman DG, Egger M, Pocock SJ, Gøtzsche PC, Vandenbroucke JP. The Strengthening  
433 the Reporting of Observational Studies in Epidemiology (STROBE) statement: guidelines for reporting  
434 observational studies. *J Clin Epidemiol*. 2008 Apr;61(4):344-9. PubMed PMID: 18313558. Epub  
435 2008/03/04. eng.
- 436 19. Kotwani P, Kwarisiima D, Clark TD, Kabami J, Geng EH, Jain V, et al. Epidemiology and awareness  
437 of hypertension in a rural Ugandan community: a cross-sectional study. *BMC Public Health*. 2013  
438 2013/12/09;13(1):1151.
- 439 20. Sani RN, Connelly PJ, Toft M, Rowa-Dewar N, Delles C, Gasevic D, et al. Rural-urban difference in  
440 the prevalence of hypertension in West Africa: a systematic review and meta-analysis. *Journal of Human*  
441 *Hypertension*. 2024 2024/04/01;38(4):352-64.
- 442 21. Sharma JR, Mabhida SE, Myers B, Apalata T, Nicol E, Benjeddou M, et al. Prevalence of  
443 Hypertension and Its Associated Risk Factors in a Rural Black Population of Mthatha Town, South Africa.  
444 *Int J Environ Res Public Health*. 2021 Jan 29;18(3). PubMed PMID: 33572921. PMCID: PMC7908535. Epub  
445 2021/02/13. eng.
- 446 22. Okello S, Muhihi A, Mohamed SF, Ameh S, Ochimana C, Oluwasanu AO, et al. Hypertension  
447 prevalence, awareness, treatment, and control and predicted 10-year CVD risk: a cross-sectional study of  
448 seven communities in East and West Africa (SevenCEWA). *BMC Public Health*. 2020;20:1-13.
- 449 23. Lionakis N, Mendrinou D, Sanidas E, Favatas G, Georgopoulou M. Hypertension in the elderly.  
450 *World J Cardiol*. 2012 May 26;4(5):135-47. PubMed PMID: 22655162. PMCID: PMC3364500. Epub  
451 2012/06/02. eng.
- 452 24. Oliveros E, Patel H, Kyung S, Fugar S, Goldberg A, Madan N, et al. Hypertension in older adults:  
453 Assessment, management, and challenges. *Clin Cardiol*. 2020 Feb;43(2):99-107. PubMed PMID:  
454 31825114. PMCID: PMC7021657. Epub 2019/12/12. eng.
- 455 25. Kandala N-B, Nnanatu CC, Dukhi N, Sewpaul R, Davids A, Reddy SP. Mapping the Burden of  
456 Hypertension in South Africa: A Comparative Analysis of the National 2012 SANHANES and the 2016  
457 Demographic and Health Survey. *International Journal of Environmental Research and Public Health*.  
458 2021;18(10):5445. PubMed PMID: doi:10.3390/ijerph18105445.

- 459 26. Princewel F, Cumber SN, Kimbi JA, Nkfusai CN, Keka EI, Viyoff VZ, et al. Prevalence and risk factors  
460 associated with hypertension among adults in a rural setting: the case of Ombe, Cameroon. *Pan African*  
461 *Medical Journal*. 2019;34(1).
- 462 27. Mustapha A, Ssekasanvu J, Chen I, Grabowski MK, Ssekubugu R, Kigozi G, et al. Hypertension and  
463 socioeconomic status in south central Uganda: a population-based cohort study. *Global Heart*. 2022;17(1).
- 464 28. Holmager TLF, Meyrowitsch DW, Bahendeka S, Nielsen J. Food intake and cardiometabolic risk  
465 factors in rural Uganda. *Archives of Public Health*. 2021 2021/02/25;79(1):24.
- 466 29. Wang DD, Li Y, Bhupathiraju SN, Rosner BA, Sun Q, Giovannucci EL, et al. Fruit and vegetable intake  
467 and mortality: results from 2 prospective cohort studies of US men and women and a meta-analysis of 26  
468 cohort studies. *Circulation*. 2021;143(17):1642-54.
- 469 30. Osei-Yeboah J, Owusu-Dabo E, Owiredu WK, Lokpo SY, Agode FD, Johnson BB. Community burden  
470 of hypertension and treatment patterns: An in-depth age predictor analysis:(The Rural Community Risk of  
471 Non-Communicable Disease Study-Nyive Phase I). *Plos one*. 2021;16(8):e0252284.
- 472 31. Bamba G, Anne-Laure J, Kumar N, Roland NG, Maxime V, Virginie G, et al. Prevalence of severe  
473 hypertension in a Sub-Saharan African community. *International Journal of Cardiology Hypertension*.  
474 2019;2:100016. PubMed PMID: GAYE2019100016.

475

476

# Hypertension among adults in rural south-western Uganda.

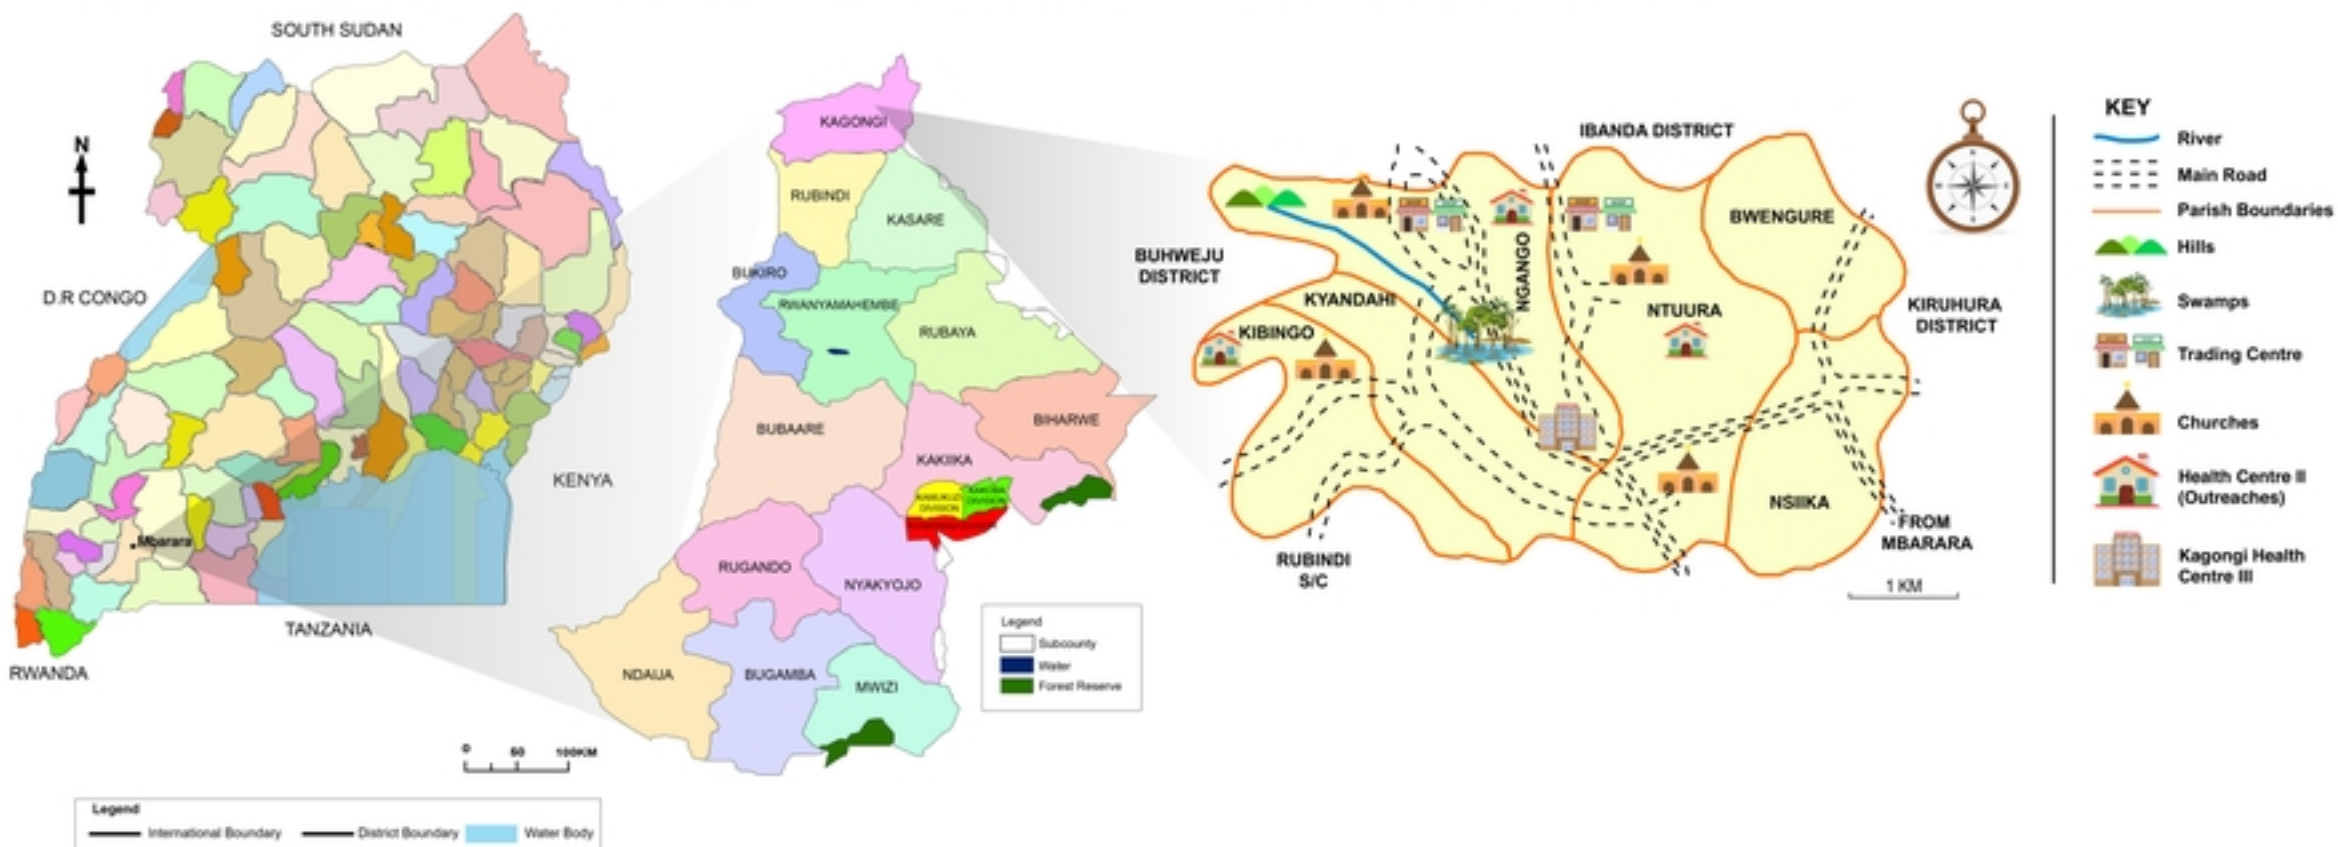

Figure 1; Map of Uganda showing Kagongi subcounty Parishes

Figure 1, study area Map

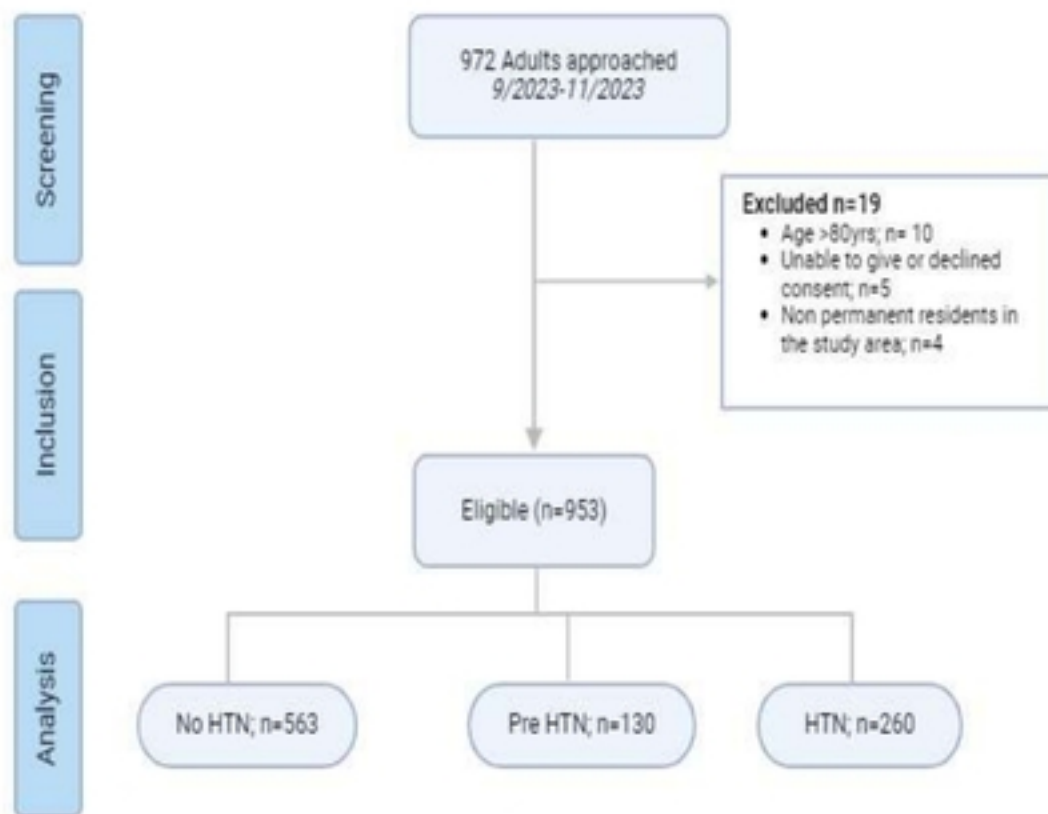

Figure 2: Study flow diagram

Figure 2, study flow diagram

## Hypertension Awareness, treatment and control rates among participants

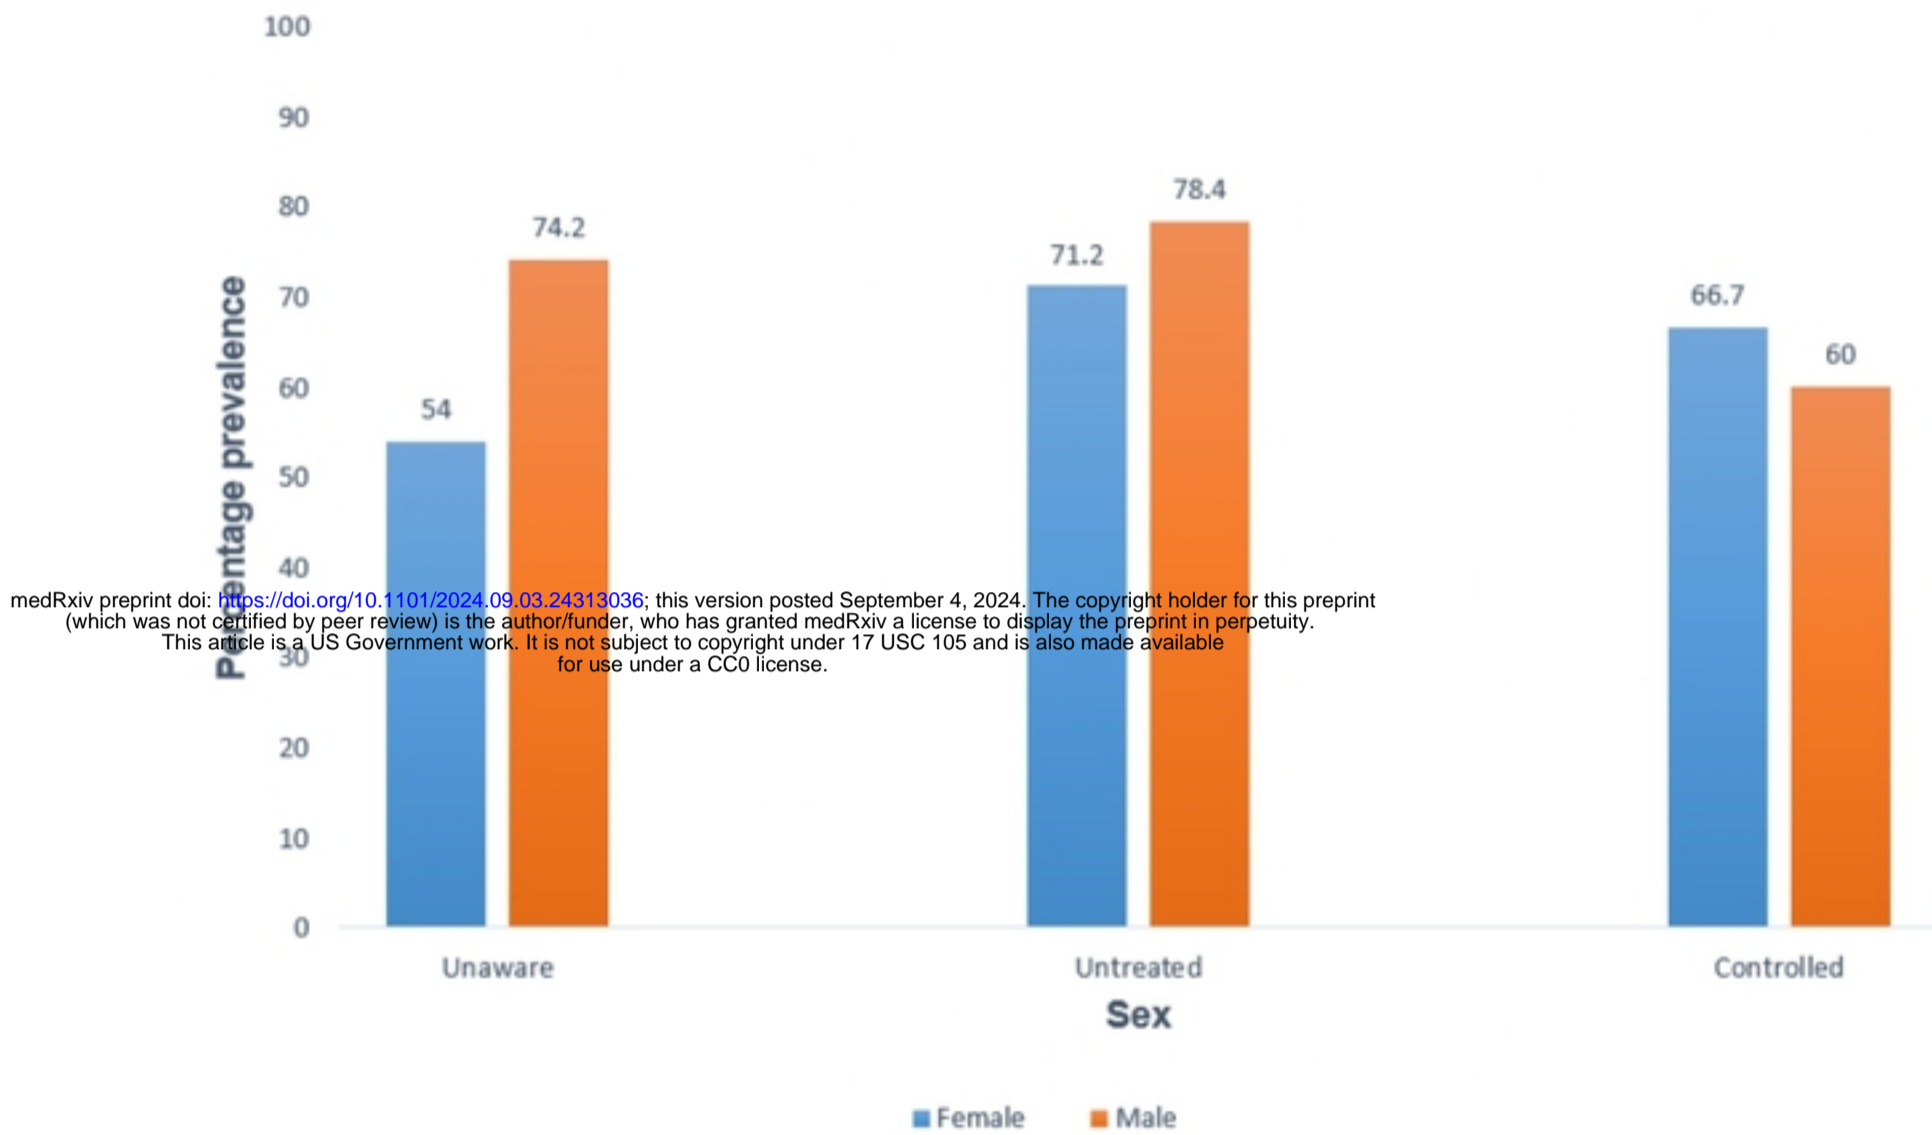

**Figure 3:** A bar graph showing the proportion of participants aware of their hypertension status, those not on medication, and those with controlled hypertension by Sex.
